# Supplementary material for: An Experimental Study Evaluating the Influence of Front-of-Package Warning Labels on Adolescent’s Purchase Intention of Processed Food Products
Source: MDPI journal article supplement (doi:10.3390/ijerph19031094), 2022-01-19
Supplement: s1 [file s1]

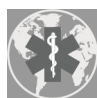

## Supplementary Material

**Table S1.** Nutritional composition per 100g of the six processed products included in the experiment.

| Product                         | Sugar (g) | Saturated fats (g) | Sodium (mg) |
|---------------------------------|-----------|--------------------|-------------|
| <b>Cookies</b>                  |           |                    |             |
| Vainilla cookies (0 WL)         | 21.6      | 4.1                | 405.4       |
| Plain cookies (1 WL)            | 21.5      | 7.5*               | 408.6       |
| Chocolate filled cookies (2 WL) | 30.6*     | 9.7*               | 333.3       |
| <b>Salty Snacks</b>             |           |                    |             |
| Pop corn (0 WL)                 | 1.0       | 2.5                | 480.0       |
| Fried tortillas (1 WL)          | 4.0       | 12.0*              | 710.0       |
| Puffed corn snacks (2 WL)       | 1.0       | 11.0*              | 1160.0*     |

WL: Warning labels, \* Product “high-in” critical nutrient according to the Supreme Decree N° 012-2018-SA.

**Table S2.** Differences in intention to purchase by school.

|     | School 1                                              |                      |           | School 2          |                      |       |
|-----|-------------------------------------------------------|----------------------|-----------|-------------------|----------------------|-------|
|     | Control*<br>n (%)                                     | Experimental<br>n(%) | p         | Control*<br>n (%) | Experimental<br>n(%) | p     |
| All | Cookies                                               |                      | 0.242     |                   |                      | 0.357 |
|     | Vainilla cookies (0 WL)                               | 36 (54.6)            | 41 (54.7) | 31 (40.8)         | 24 (31.6)            |       |
|     | Plain cookies (1 WL)                                  | 17 (25.8)            | 26 (34.7) | 24 (31.6)         | 32 (42.1)            |       |
|     | Chocolate filled cookies (2 WL)                       | 13 (19.7)            | 8 (10.6)  | 21 (27.6)         | 20 (26.3)            |       |
|     | Salty Snacks                                          |                      | 0.163     |                   |                      | 0.440 |
|     | Pop corn (0 WL)                                       | 14 (37.8)            | 17 (58.6) | 24 (53.3)         | 19 (42.2)            |       |
|     | Fried tortillas (1 WL)                                | 17 (46.0)            | 7 (24.1)  | 16 (35.6)         | 22 (48.9)            |       |
|     | Puffed corn snacks (2 WL)                             | 6 (16.2)             | 5 (17.3)  | 5 (11.1)          | 4 (8.9)              |       |
|     |                                                       |                      | 0.422     |                   |                      | 0.162 |
|     | Vainilla cookies and pop corn (0 WL)                  | 50 (48.5)            | 58 (55.8) | 55 (45.5)         | 43 (35.5)            |       |
|     | Plain cookies and fried tortillas (1 WL)              | 34 (33.0)            | 33 (31.7) | 40 (33.1)         | 54 (44.6)            |       |
|     | Chocolate filled cookies and puffed corn snack (2 WL) | 19 (18.5)            | 13 (12.5) | 26 (21.5)         | 24 (19.8)            |       |

\* Packaged food without warning labels, WL: Warning labels

**Table S3.** Differences in identification of healthiest food by school.

|                                                       | School 1          |                      |       | School 2          |                      |       |
|-------------------------------------------------------|-------------------|----------------------|-------|-------------------|----------------------|-------|
|                                                       | Control*<br>n (%) | Experimental<br>n(%) | P     | Control*<br>n (%) | Experimental<br>n(%) | P     |
| <b>Cookies</b>                                        |                   |                      | 0.498 |                   |                      | 0.149 |
| Vainilla cookies (0 WL)                               | 58 (87.9)         | 61 (81.3)            |       | 57 (75.0)         | 65 (85.5)            |       |
| Plain cookies (1 WL)                                  | 7 (10.6)          | 11 (14.7)            |       | 17 (22.4)         | 11 (14.5)            |       |
| Chocolate filled cookies (2 WL)                       | 1 (1.5)           | 3 (4.0)              |       | 2 (2.6)           | 0 (0.0)              |       |
| <b>Salty Snacks</b>                                   |                   |                      | 0.231 |                   |                      | 0.365 |
| Pop corn (0 WL)                                       | 34 (91.9)         | 24 (82.8)            |       | 39 (86.7)         | 38 (84.4)            |       |
| Fried tortillas (1 WL)                                | 2 (5.4)           | 1 (3.5)              |       | 3 (6.7)           | 1 (2.2)              |       |
| Puffed corn snacks (2 WL)                             | 1 (2.7)           | 4 (13.8)             |       | 3 (6.6)           | 6 (13.3)             |       |
| <b>All</b>                                            |                   |                      | 0.176 |                   |                      | 0.311 |
| Vainilla cookies and pop corn (0 WL)                  | 92 (89.3)         | 85 (81.7)            |       | 96 (79.3)         | 103 (85.1)           |       |
| Plain cookies and fried tortillas (1 WL)              | 9 (8.7)           | 11 (11.5)            |       | 20 (16.5)         | 12 (9.9)             |       |
| Chocolate filled cookies and puffed corn snack (2 WL) | 2 (1.9)           | 7 (6.7)              |       | 5 (4.2)           | 6 (5.0)              |       |

\* Packaged food without warning labels, WL: Warning labels

**Table S4.** Differences in intention to purchase by school level.

|                                                       | Primary           |                      |       | Secondary         |                      |       |
|-------------------------------------------------------|-------------------|----------------------|-------|-------------------|----------------------|-------|
|                                                       | Control*<br>n (%) | Experimental<br>n(%) | P     | Control*<br>n (%) | Experimental<br>n(%) | P     |
| <b>Cookies</b>                                        |                   |                      | 0.380 |                   |                      | 0.017 |
| Vainilla cookies (0 WL)                               | 32 (57.3)         | 24 (45.3)            |       | 35 (42.7)         | 41 (41.8)            |       |
| Plain cookies (1 WL)                                  | 22 (33.7)         | 19 (39.8)            |       | 19 (23.2)         | 39 (39.8)            |       |
| Chocolate filled cookies (2 WL)                       | 6 (10.0)          | 10 (18.9)            |       | 28 (34.1)         | 18 (18.4)            |       |
| <b>Salty Snacks</b>                                   |                   |                      | 0.711 |                   |                      | 0.925 |
| Pop corn (0 WL)                                       | 9 (39.1)          | 16 (47.1)            |       | 29 (49.2)         | 20 (50.0)            |       |
| Fried tortillas (1 WL)                                | 12 (57.2)         | 14 (41.2)            |       | 21 (35.6)         | 15 (37.5)            |       |
| Puffed corn snacks (2 WL)                             | 2 (8.7)           | 4 (11.8)             |       | 9 (15.3)          | 5 (12.5)             |       |
| <b>All</b>                                            |                   |                      | 0.456 |                   |                      | 0.067 |
| Vainilla cookies and pop corn (0 WL)                  | 41 (49.4)         | 40 (46.0)            |       | 64 (45.4)         | 61 (44.2)            |       |
| Plain cookies and fried tortillas (1 WL)              | 34 (41.0)         | 33 (37.9)            |       | 40 (28.4)         | 54 (39.1)            |       |
| Chocolate filled cookies and puffed corn snack (2 WL) | 8 (9.6)           | 14 (16.1)            |       | 37 (26.2)         | 23 (16.7)            |       |

\* Packaged food without warning labels, WL: Warning labels

**Table S5.** Differences in identification of healthiest food by school level.

|                                                       | Primary           |                      |       | Secondary         |                      |       |
|-------------------------------------------------------|-------------------|----------------------|-------|-------------------|----------------------|-------|
|                                                       | Control*<br>n (%) | Experimental<br>n(%) | p     | Control*<br>n (%) | Experimental<br>n(%) | p     |
| <b>Cookies</b>                                        |                   |                      | 0.688 |                   |                      | 0.911 |
| Vainilla cookies (0 WL)                               | 46 (76.7)         | 44 (83.0)            |       | 69 (84.2)         | 82 (83.7)            |       |
| Plain cookies (1 WL)                                  | 12 (20.0)         | 8 (15.1)             |       | 12 (14.6)         | 14 (14.3)            |       |
| Chocolate filled cookies (2 WL)                       | 2 (3.3)           | 1 (1.9)              |       | 1 (1.2)           | 2 (2.0)              |       |
| <b>Salty Snacks</b>                                   |                   |                      | 0.348 |                   |                      | 0.067 |
| Pop corn (0 WL)                                       | 20 (87.0)         | 25 (73.5)            |       | 53 (89.8)         | 37 (92.5)            |       |
| Fried tortillas (1 WL)                                | 0 (0.0)           | 2 (5.9)              |       | 5 (8.5)           | 0 (0.0)              |       |
| Puffed corn snacks (2 WL)                             | 3 (13.0)          | 7 (20.6)             |       | 1 (1.7)           | 3 (7.5)              |       |
| <b>All</b>                                            |                   |                      | 0.655 |                   |                      | 0.454 |
| Vainilla cookies and pop corn (0 WL)                  | 66 (79.5)         | 69 (79.3)            |       | 122 (86.5)        | 119 (86.2)           |       |
| Plain cookies and fried tortillas (1 WL)              | 12 (14.5)         | 10 (11.5)            |       | 17 (12.1)         | 14 (10.2)            |       |
| Chocolate filled cookies and puffed corn snack (2 WL) | 5 (6.0)           | 8 (9.2)              |       | 2 (1.4)           | 5 (3.6)              |       |

\* Packaged food without warning labels, WL: Warning labels

**Table S6.** Differences in intention to purchase by sex.

|                                                       | Male              |                      |       | Female            |                      |       |
|-------------------------------------------------------|-------------------|----------------------|-------|-------------------|----------------------|-------|
|                                                       | Control*<br>n (%) | Experimental<br>n(%) | p     | Control*<br>n (%) | Experimental<br>n(%) | p     |
| <b>Cookies</b>                                        |                   |                      | 0.235 |                   |                      | 0.322 |
| Vainilla cookies (0 WL)                               | 22 (40.7)         | 27 (45.0)            |       | 45 (51.1)         | 38 (41.8)            |       |
| Plain cookies (1 WL)                                  | 17 (31.5)         | 24 (40.0)            |       | 24 (27.3)         | 34 (37.4)            |       |
| Chocolate filled cookies (2 WL)                       | 15 (27.8)         | 9 (15.0)             |       | 19 (21.6)         | 19 (20.8)            |       |
| <b>Salty Snacks</b>                                   |                   |                      | 0.119 |                   |                      | 0.130 |
| Pop corn (0 WL)                                       | 17 (48.6)         | 19 (52.8)            |       | 21 (44.7)         | 17 (44.7)            |       |
| Fried tortillas (1 WL)                                | 16 (45.7)         | 10 (27.8)            |       | 17 (36.2)         | 19 (50.0)            |       |
| Puffed corn snacks (2 WL)                             | 2 (5.7)           | 7 (19.4)             |       | 9 (19.2)          | 2 (5.3)              |       |
| <b>All</b>                                            |                   |                      | 0.836 |                   |                      | 0.183 |
| Vainilla cookies and pop corn (0 WL)                  | 39 (43.8)         | 46 (47.9)            |       | 66 (48.9)         | 55 (42.6)            |       |
| Plain cookies and fried tortillas (1 WL)              | 33 (37.1)         | 34 (35.4)            |       | 41 (30.4)         | 53 (41.1)            |       |
| Chocolate filled cookies and puffed corn snack (2 WL) | 17 (19.1)         | 16 (16.7)            |       | 28 (20.7)         | 21 (16.3)            |       |

\* Packaged food without warning labels, WL: Warning labels

**Table S7.** Differences in identification of healthiest food by sex.

|                                                       | Male              |                      |       | Female            |                      |       |
|-------------------------------------------------------|-------------------|----------------------|-------|-------------------|----------------------|-------|
|                                                       | Control*<br>n (%) | Experimental<br>n(%) | p     | Control*<br>n (%) | Experimental<br>n(%) | p     |
| <b>Cookies</b>                                        |                   |                      | 0.368 |                   |                      | 0.376 |
| Vainilla cookies (0 WL)                               | 41 (75.9)         | 51 (85.0)            |       | 74 (84.1)         | 75 (82.4)            |       |
| Plain cookies (1 WL)                                  | 10 (18.5)         | 8 (13.3)             |       | 14 (15.9)         | 14 (15.4)            |       |
| Chocolate filled cookies (2 WL)                       | 3 (5.6)           | 1 (1.7)              |       | 0 (0.0)           | 2 (2.2)              |       |
| <b>Salty Snacks</b>                                   |                   |                      | 0.248 |                   |                      | 0.357 |
| Pop corn (0 WL)                                       | 31 (88.6)         | 31 (86.1)            |       | 42 (89.4)         | 31 (81.6)            |       |
| Fried tortillas (1 WL)                                | 3 (8.6)           | 1 (2.8)              |       | 2 (4.3)           | 1 (2.6)              |       |
| Puffed corn snacks (2 WL)                             | 1 (2.9)           | 4 (11.1)             |       | 3 (6.3)           | 6 (15.8)             |       |
| <b>All</b>                                            |                   |                      | 0.542 |                   |                      | 0.270 |
| Vainilla cookies and pop corn (0 WL)                  | 72 (80.9)         | 82 (85.4)            |       | 116 (85.9)        | 106 (82.2)           |       |
| Plain cookies and fried tortillas (1 WL)              | 13 (14.6)         | 9 (9.4)              |       | 16 (11.9)         | 15 (11.6)            |       |
| Chocolate filled cookies and puffed corn snack (2 WL) | 4 (4.5)           | 5 (5.2)              |       | 3 (2.2)           | 8 (6.2)              |       |

\* Packaged food without warning labels, WL: Warning labels

**Table S8.** Differences by number of warning labels between the experimental and control group.

| Outcome                                  |           | $\beta$ | se    | p     | 95%CI  |       |
|------------------------------------------|-----------|---------|-------|-------|--------|-------|
| <b>Intention to purchase</b>             | 0 vs 2 WL | 0.157   | 0.262 | 0.549 | -0.357 | 0.671 |
|                                          | 1 vs 2 WL | 0.358   | 0.273 | 0.189 | -0.177 | 0.892 |
| <b>Identification of healthiest food</b> | 0 vs 2 WL | -0.619  | 0.480 | 0.197 | -1.560 | 0.322 |
|                                          | 1 vs 2 WL | -0.808  | 0.544 | 0.137 | -1.874 | 0.258 |

WL: Warning labels.
